# Supplementary material
Source: ML conference proceedings conference paper supplement (https://openreview.net/forum?id=IuigXFBGHI)

Logistic fits of variance vs depth per run

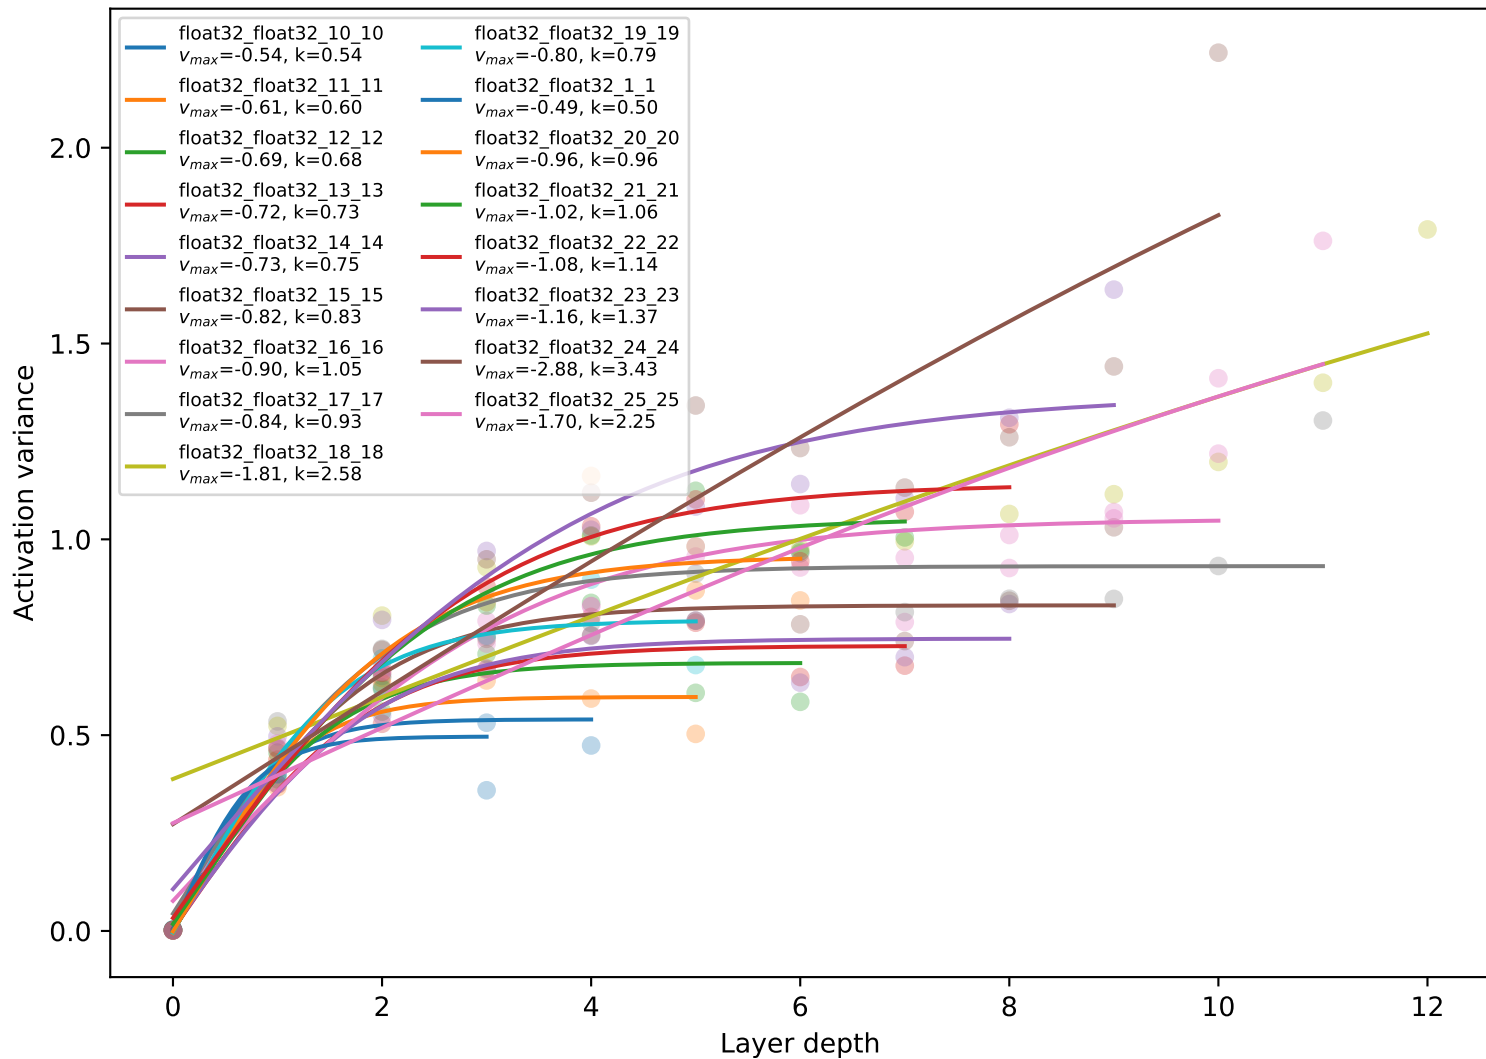

Supplement: supplementary_material [file Logistic_fits.pdf › systems-scaling/olmo/Logistic_fits.pdf]

Per-layer activation variance (all runs, last layer skipped)

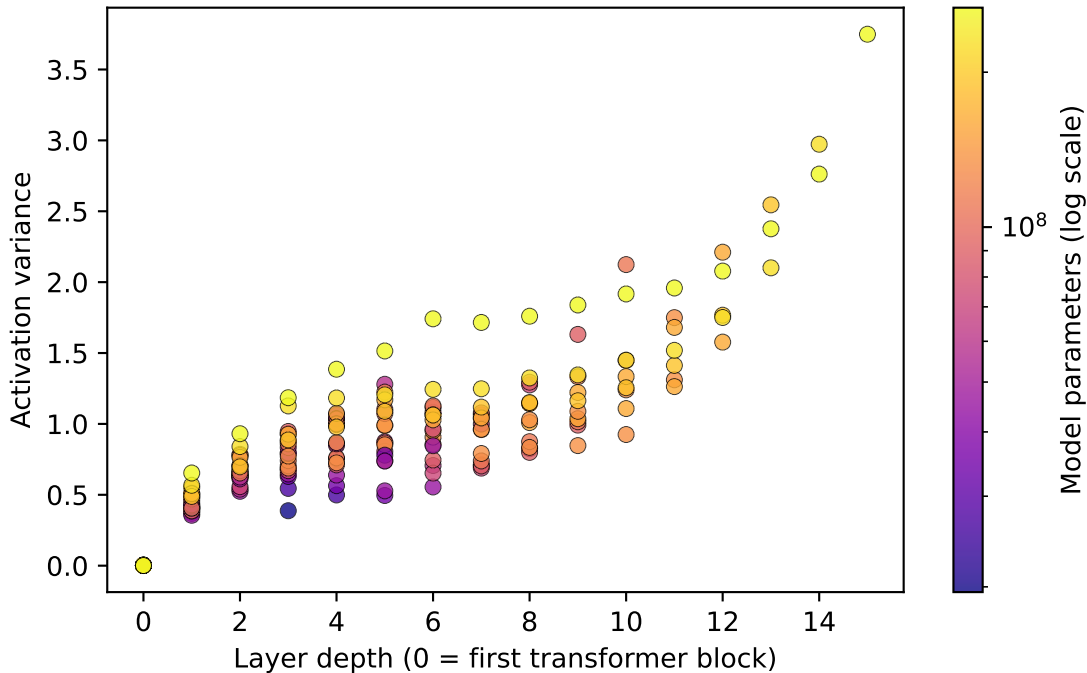

Supplement: supplementary_material [file Per_layer_activation_variance.pdf › systems-scaling/olmo/Per_layer_activation_variance.pdf]
